# Supplementary material
Source: PubMed Central journal article supplement (PMC7106025)
Supplement: mmc1.pdf [file mmc1.pdf]

Supplementary Material: Quality control of alignment sequencing data obtained with Qualimap 2 (Okonechnikov et al., 2016).

# Qualimap Analysis Results

*BAM QC analysis*

*Generated by Qualimap v.2.2*

UY/11/CA/18

# 1. Input data & parameters

## 1.1. QualiMap command line

UY/11/CA/18.sort.bam

## 1.2. Alignment

|                                       |                                    |
|---------------------------------------|------------------------------------|
| Draw chromosome limits:               | no                                 |
| Analyze overlapping paired-end reads: | no                                 |
| Program:                              | bowtie2 (2.1.0)                    |
| Analysis date:                        | Thu May 19 16:29:48 GMT-03:00 2016 |
| Size of a homopolymer:                | 3                                  |
| Skip duplicate alignments:            | no                                 |
| Number of windows:                    | 400                                |
| BAM file:                             | UY/11/CA/18.sort.bam               |

## 2. Summary

### 2.1. Globals

|                              |                    |
|------------------------------|--------------------|
| Reference size               | 27.636             |
| Number of reads              | 2.278.516          |
| Mapped reads                 | 1.967.637 / 86,36% |
| Unmapped reads               | 310.879 / 13,64%   |
| Mapped paired reads          | 1.967.637 / 86,36% |
| Mapped reads, first in pair  | 998.910 / 43,84%   |
| Mapped reads, second in pair | 968.727 / 42,52%   |
| Mapped reads, both in pair   | 1.886.066 / 82,78% |
| Mapped reads, singletons     | 81.571 / 3,58%     |
| Read min/max/mean length     | 20 / 300 / 169,85  |
| Duplicated reads (estimated) | 1.942.330 / 85,25% |
| Duplication rate             | 98,78%             |
| Clipped reads                | 0 / 0%             |

### 2.2. ACGT Content

|                          |                      |
|--------------------------|----------------------|
| Number/percentage of A's | 96.958.906 / 28,78%  |
| Number/percentage of C's | 54.668.304 / 16,23%  |
| Number/percentage of T's | 110.782.702 / 32,88% |
| Number/percentage of G's | 74.491.179 / 22,11%  |
| Number/percentage of N's | 0 / 0%               |
| GC Percentage            | 38,34%               |

## 2.3. Coverage

|                    |             |
|--------------------|-------------|
| Mean               | 12.196,4277 |
| Standard Deviation | 5.743,8155  |

## 2.4. Mapping Quality

|                      |       |
|----------------------|-------|
| Mean Mapping Quality | 23,16 |
|----------------------|-------|

## 2.5. Insert size

|                    |                 |
|--------------------|-----------------|
| Mean               | 525,24          |
| Standard Deviation | 163,05          |
| P25/Median/P75     | 409 / 513 / 630 |

## 2.6. Mismatches and indels

|                                          |            |
|------------------------------------------|------------|
| General error rate                       | 4,07%      |
| Mismatches                               | 13.491.862 |
| Insertions                               | 96.914     |
| Mapped reads with at least one insertion | 4,09%      |
| Deletions                                | 45.195     |
| Mapped reads with at least one deletion  | 2,1%       |
| Homopolymer indels                       | 36,92%     |

## 2.7. Chromosome stats

| Name | Length | Mapped bases | Mean coverage | Standard deviation |
|------|--------|--------------|---------------|--------------------|
|      |        |              |               |                    |

|                                                                                                           |       |           |             |            |
|-----------------------------------------------------------------------------------------------------------|-------|-----------|-------------|------------|
| gi 171988306 <br>gb EU418976<br>.1 Infectiousbr<br>onchitisvirusst<br>rainArkDPI11,<br>completegeno<br>me | 27636 | 337060477 | 12.196,4277 | 5.743,8155 |
|-----------------------------------------------------------------------------------------------------------|-------|-----------|-------------|------------|

### 3. Results : Coverage across reference

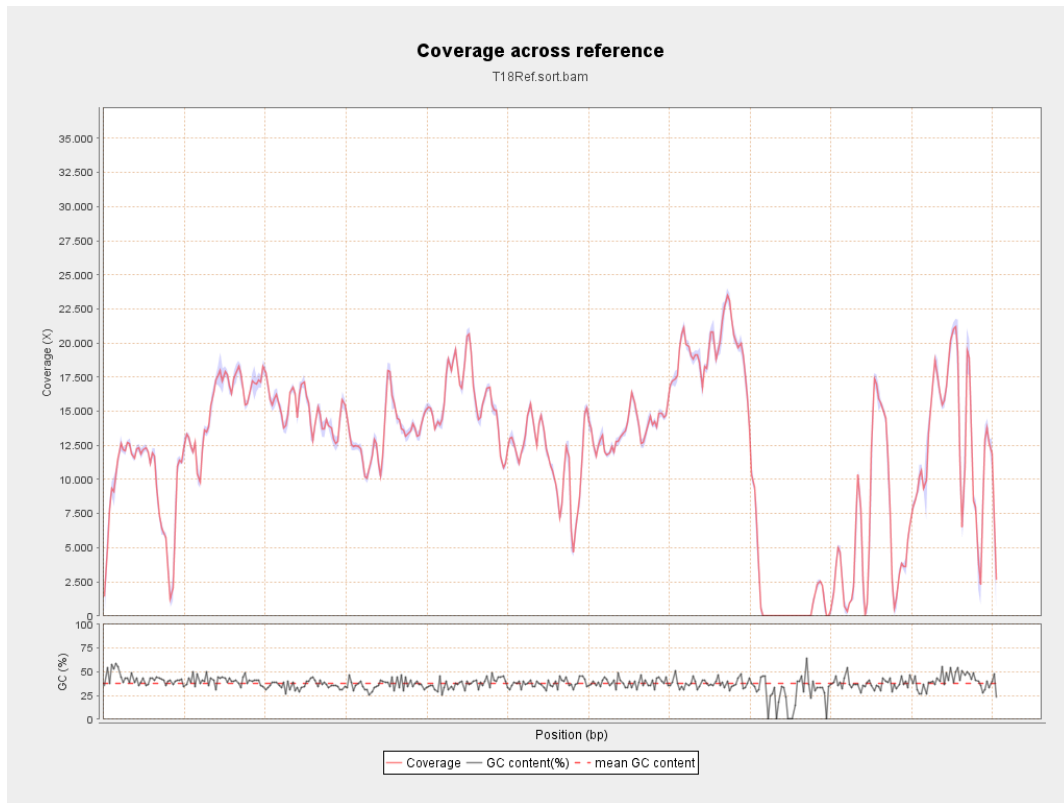

# 4. Results : Coverage Histogram

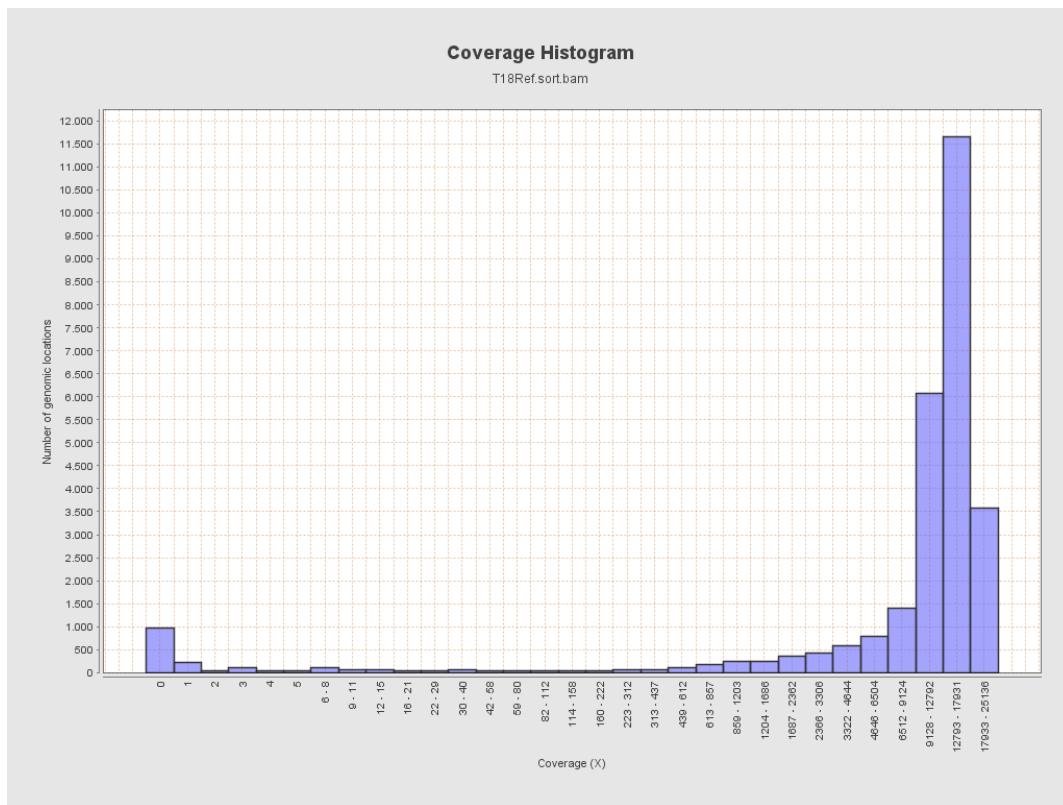



## 5. Results : Coverage Histogram (0-50X)

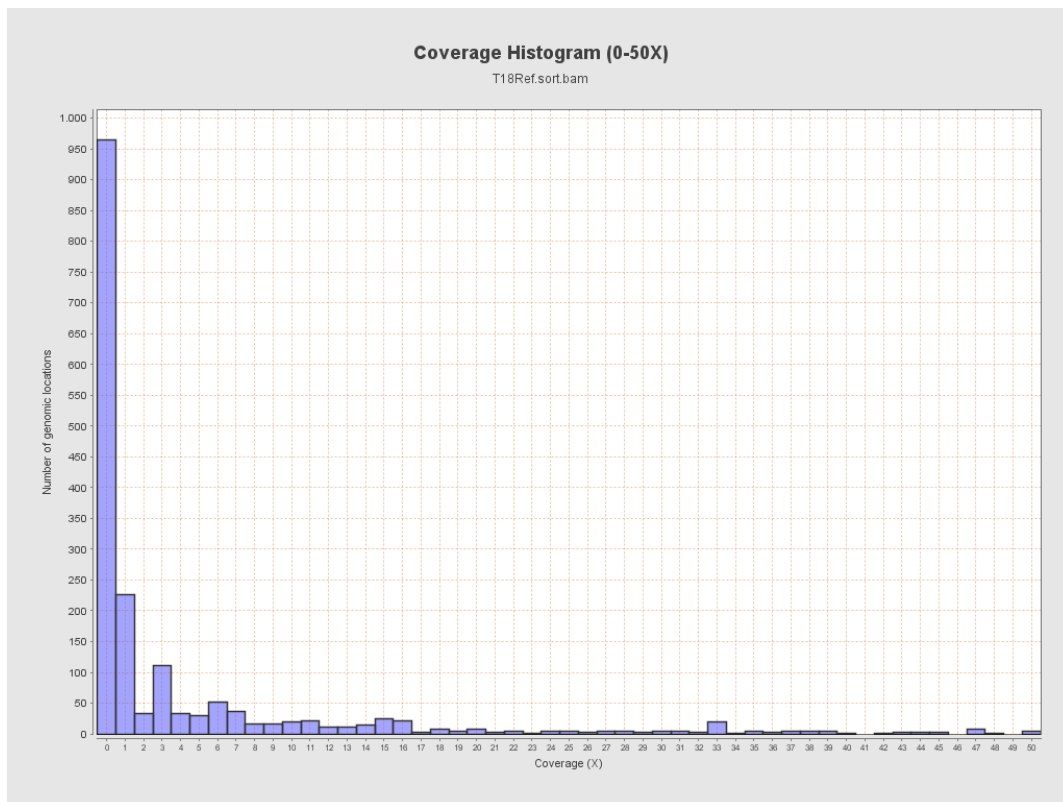

## 6. Results : Genome Fraction Coverage

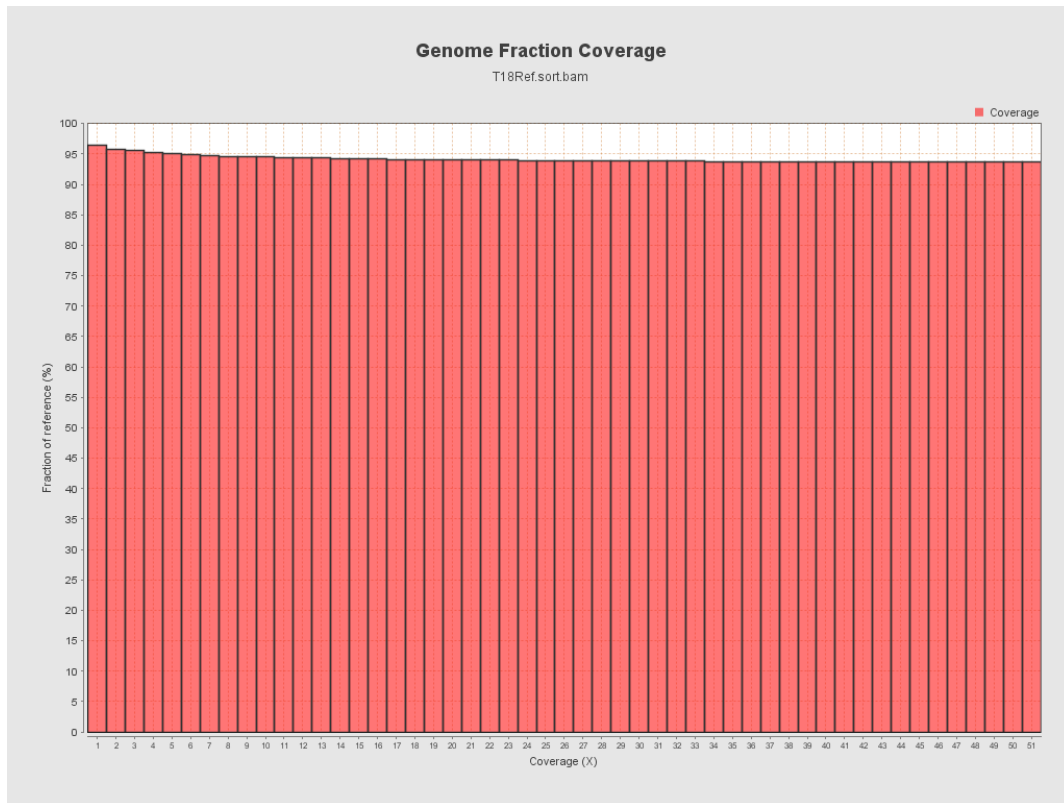

# 7. Results : Duplication Rate Histogram

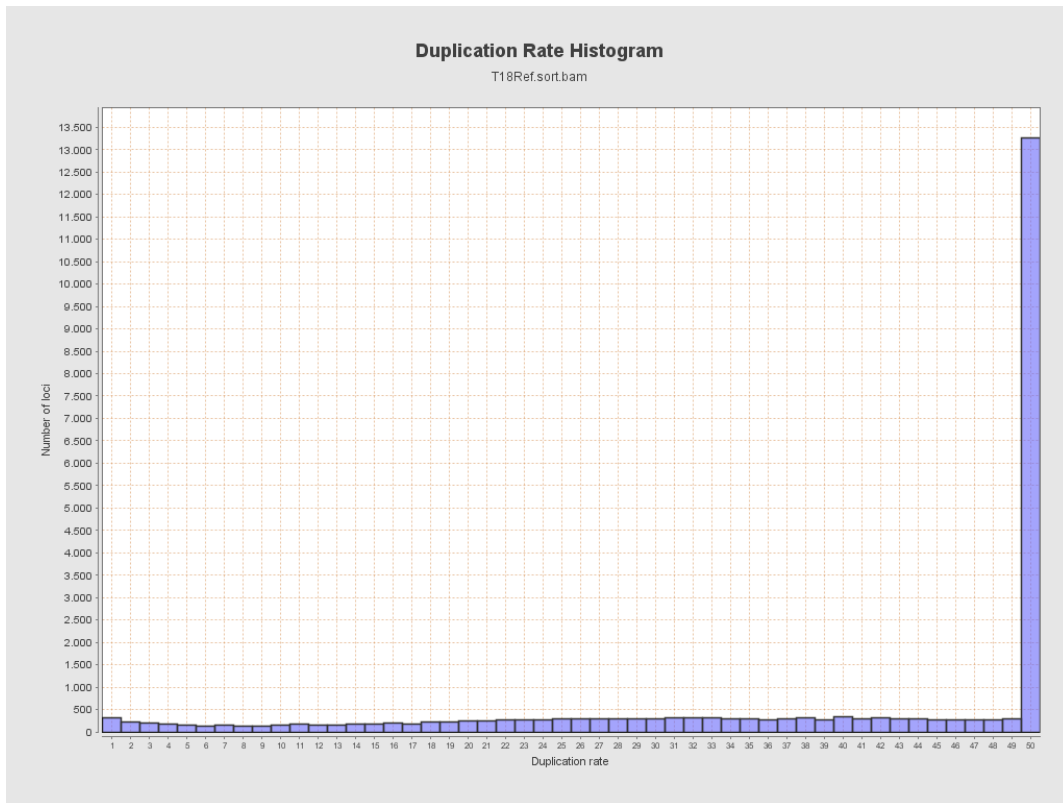

# 8. Results : Mapped Reads Nucleotide Content

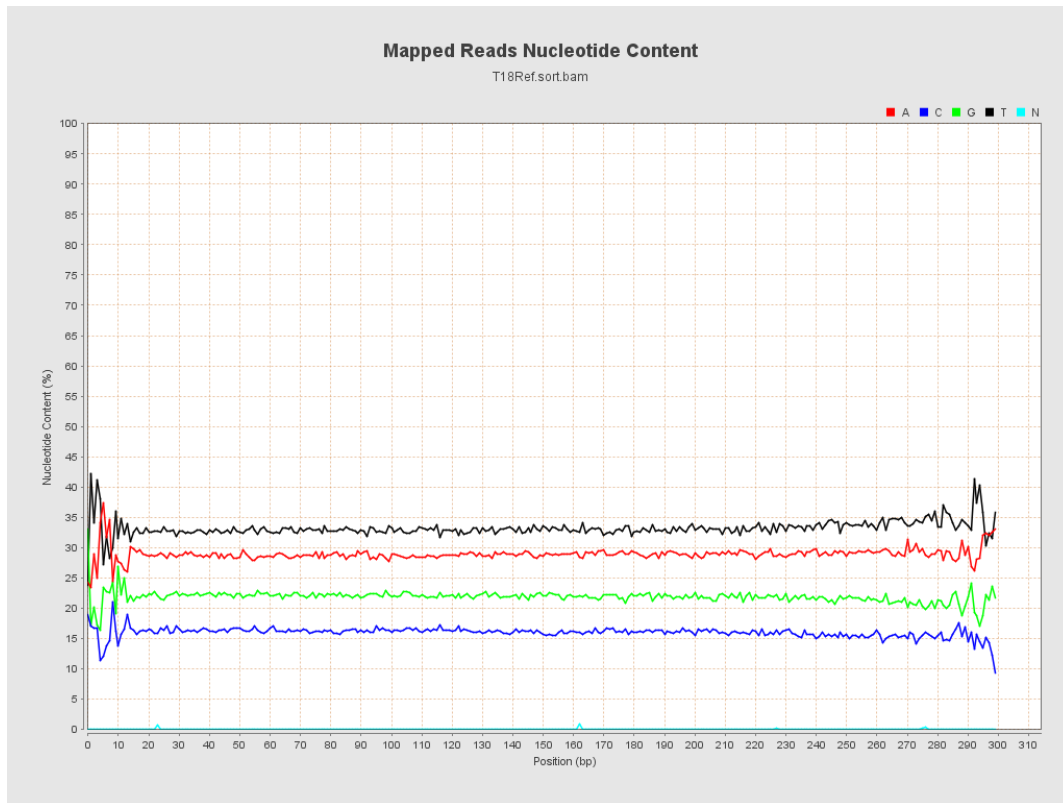

## 9. Results : Mapped Reads GC-content Distribution

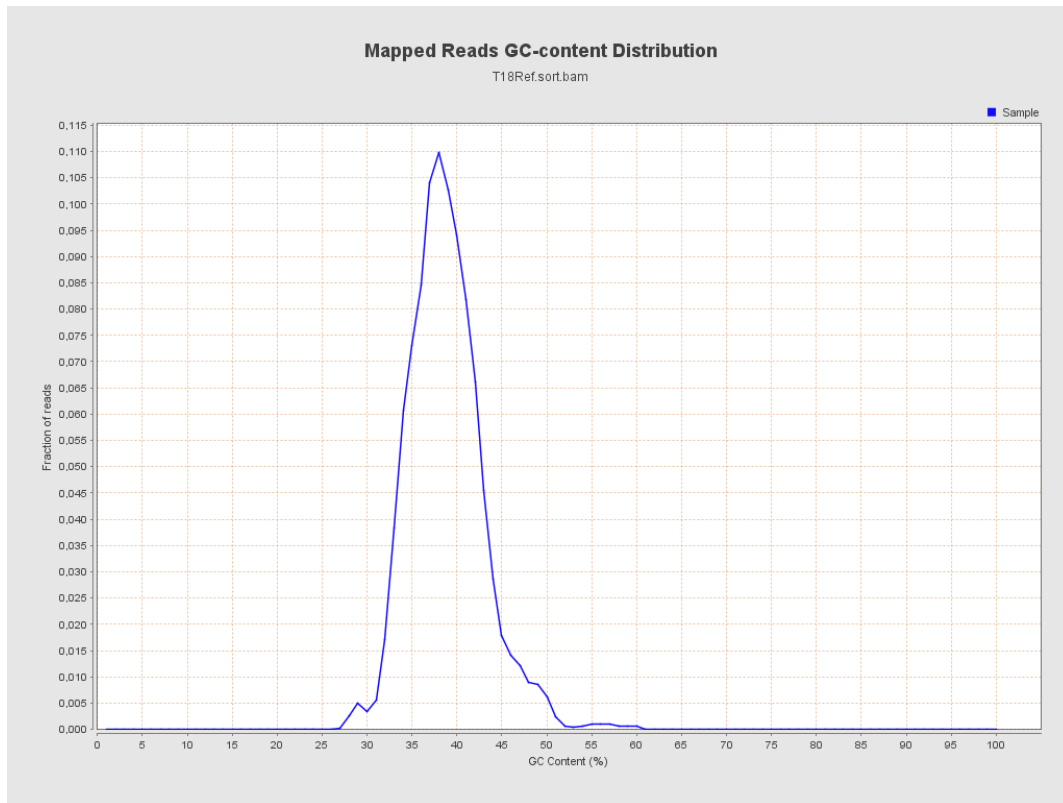

## 10. Results : Homopolymer Indels

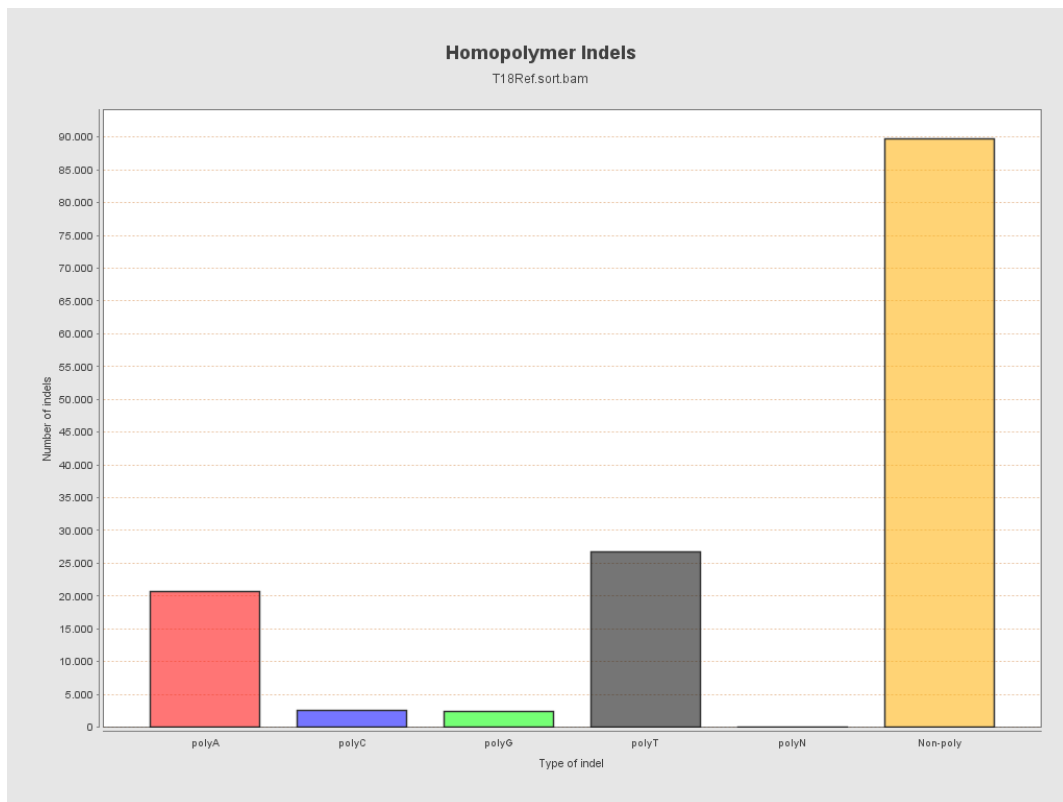

# 11. Results : Mapping Quality Across Reference

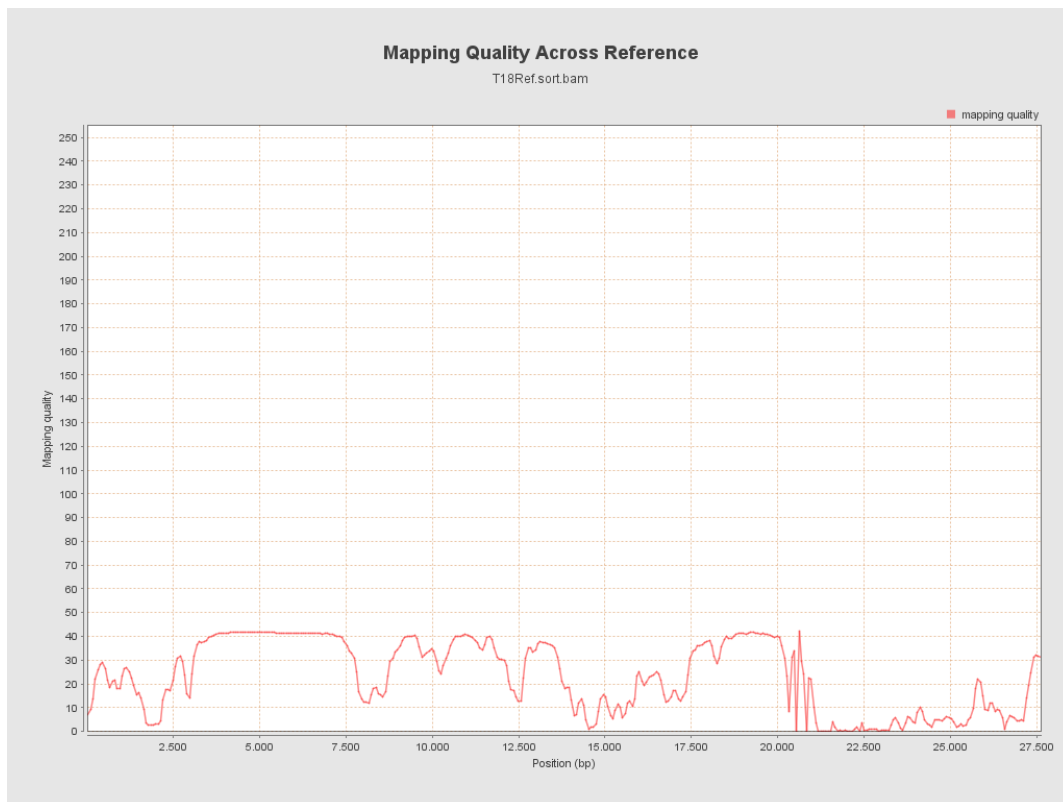

# 12. Results : Mapping Quality Histogram

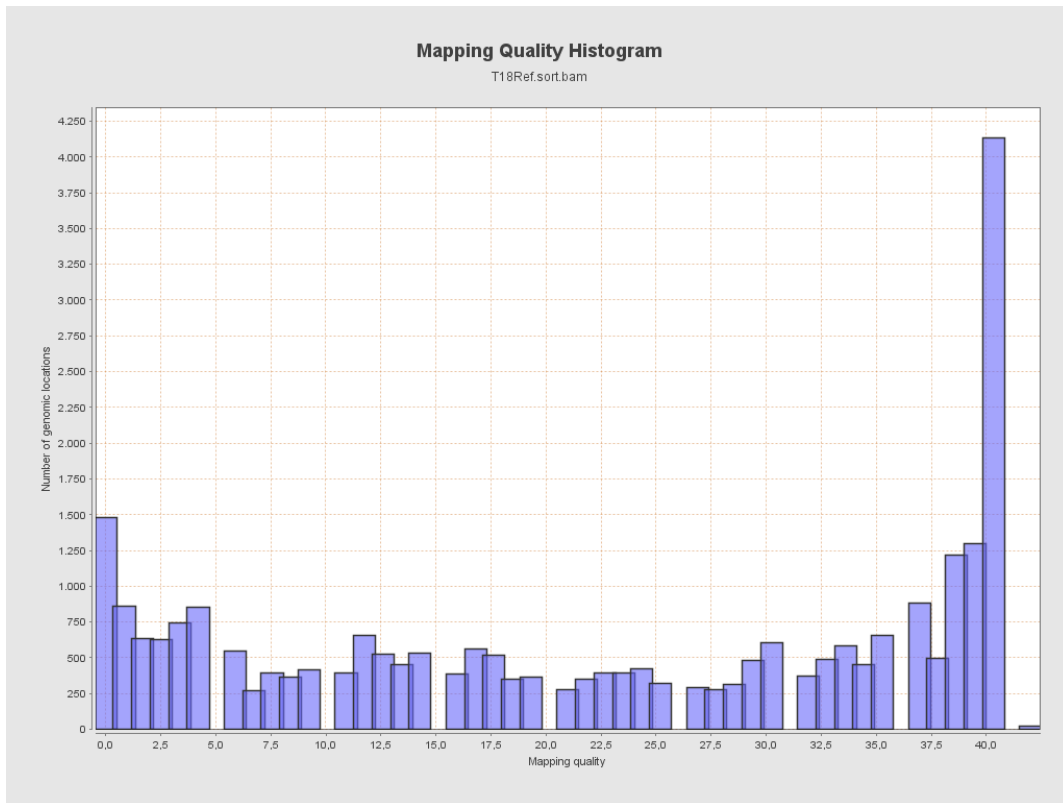



# 13. Results : Insert Size Across Reference

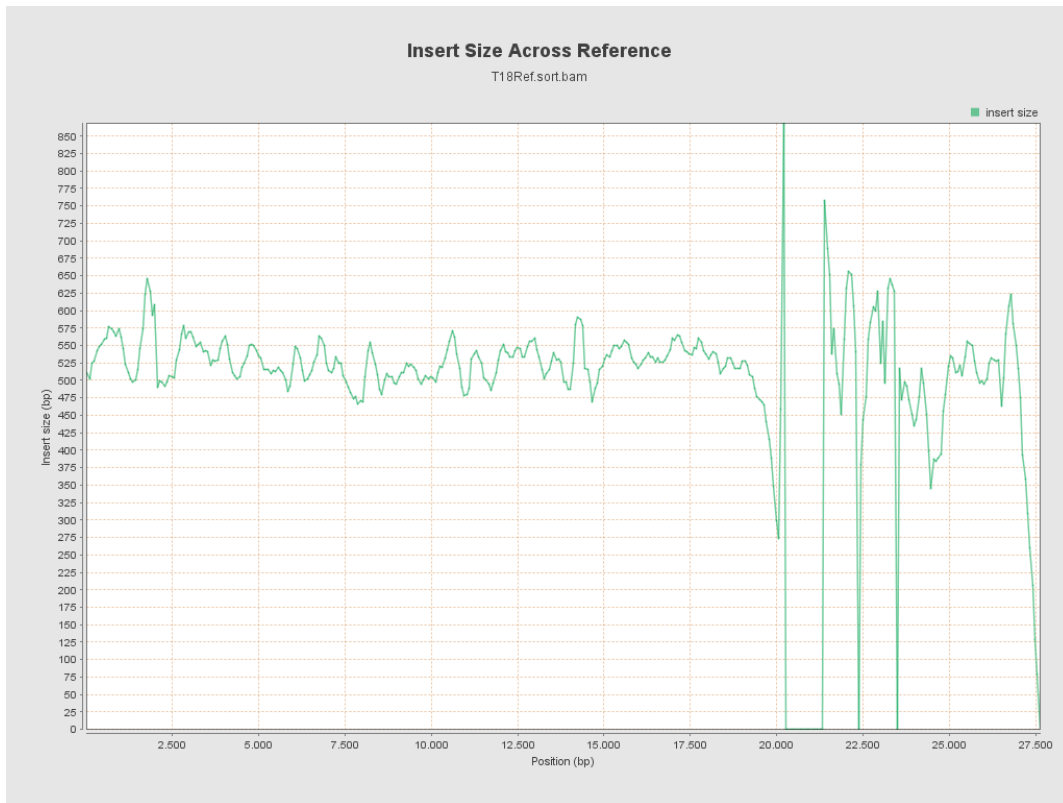

# 14. Results : Insert Size Histogram

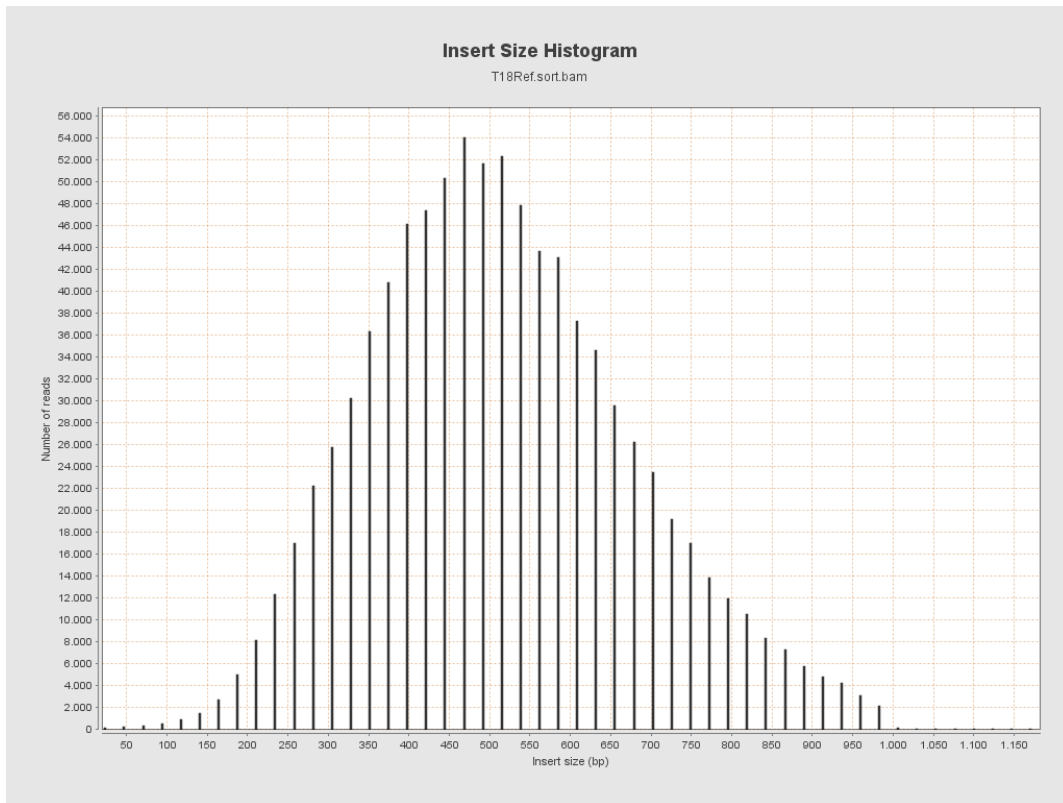

# Qualimap Analysis Results

*BAM QC analysis*

*Generated by Qualimap v.2.2*

UY/09/CA/01

# 1. Input data & parameters

## 1.1. QualiMap command line

UY/09/CA/01.sort.bam

## 1.2. Alignment

|                                       |                                    |
|---------------------------------------|------------------------------------|
| Draw chromosome limits:               | no                                 |
| Analyze overlapping paired-end reads: | yes                                |
| Program:                              | bowtie2 (2.1.0)                    |
| Analysis date:                        | Thu May 19 16:34:27 GMT-03:00 2016 |
| Size of a homopolymer:                | 3                                  |
| Skip duplicate alignments:            | no                                 |
| Number of windows:                    | 400                                |
| BAM file:                             | UY/09/CA/01.sort.bam               |

## 2. Summary

### 2.1. Globals

|                              |                    |
|------------------------------|--------------------|
| Reference size               | 27.370             |
| Number of reads              | 3.723.022          |
| Mapped reads                 | 2.932.135 / 78,76% |
| Unmapped reads               | 790.887 / 21,24%   |
| Mapped paired reads          | 2.932.135 / 78,76% |
| Mapped reads, first in pair  | 1.493.733 / 40,12% |
| Mapped reads, second in pair | 1.438.402 / 38,64% |
| Mapped reads, both in pair   | 2.809.452 / 75,46% |
| Mapped reads, singletons     | 122.683 / 3,3%     |
| Read min/max/mean length     | 20 / 300 / 176,31  |
| Overlapping read pairs       | 897.273 / 48,2%    |
| Duplicated reads (estimated) | 2.906.485 / 78,07% |
| Duplication rate             | 98,62%             |
| Clipped reads                | 0 / 0%             |

### 2.2. ACGT Content

|                          |                      |
|--------------------------|----------------------|
| Number/percentage of A's | 151.104.114 / 28,91% |
| Number/percentage of C's | 85.627.002 / 16,38%  |
| Number/percentage of T's | 173.307.368 / 33,15% |
| Number/percentage of G's | 112.683.228 / 21,56% |
| Number/percentage of N's | 0 / 0%               |
| GC Percentage            | 37,94%               |

## 2.3. Coverage

|                                         |             |
|-----------------------------------------|-------------|
| Mean                                    | 19.104,9693 |
| Standard Deviation                      | 8.467,8684  |
| Mean (paired-end reads overlap ignored) | 15.332,25   |

## 2.4. Mapping Quality

|                      |       |
|----------------------|-------|
| Mean Mapping Quality | 22,61 |
|----------------------|-------|

## 2.5. Insert size

|                    |                 |
|--------------------|-----------------|
| Mean               | 387,96          |
| Standard Deviation | 145,67          |
| P25/Median/P75     | 285 / 359 / 463 |

## 2.6. Mismatches and indels

|                                          |            |
|------------------------------------------|------------|
| General error rate                       | 4,22%      |
| Mismatches                               | 21.609.966 |
| Insertions                               | 163.918    |
| Mapped reads with at least one insertion | 4,39%      |
| Deletions                                | 79.815     |
| Mapped reads with at least one deletion  | 2,59%      |
| Homopolymer indels                       | 52,49%     |

## 2.7. Chromosome stats

| Name                                                                                                    | Length | Mapped bases | Mean coverage | Standard deviation |
|---------------------------------------------------------------------------------------------------------|--------|--------------|---------------|--------------------|
| gi 914339339 gb KP780179.1 Infectiousbr onchitisvirusstrain gammaCoV/Ck/Italy/I2022/13, complete genome | 27370  | 522903011    | 19.104,9693   | 8.467,8684         |

### 3. Results : Coverage across reference

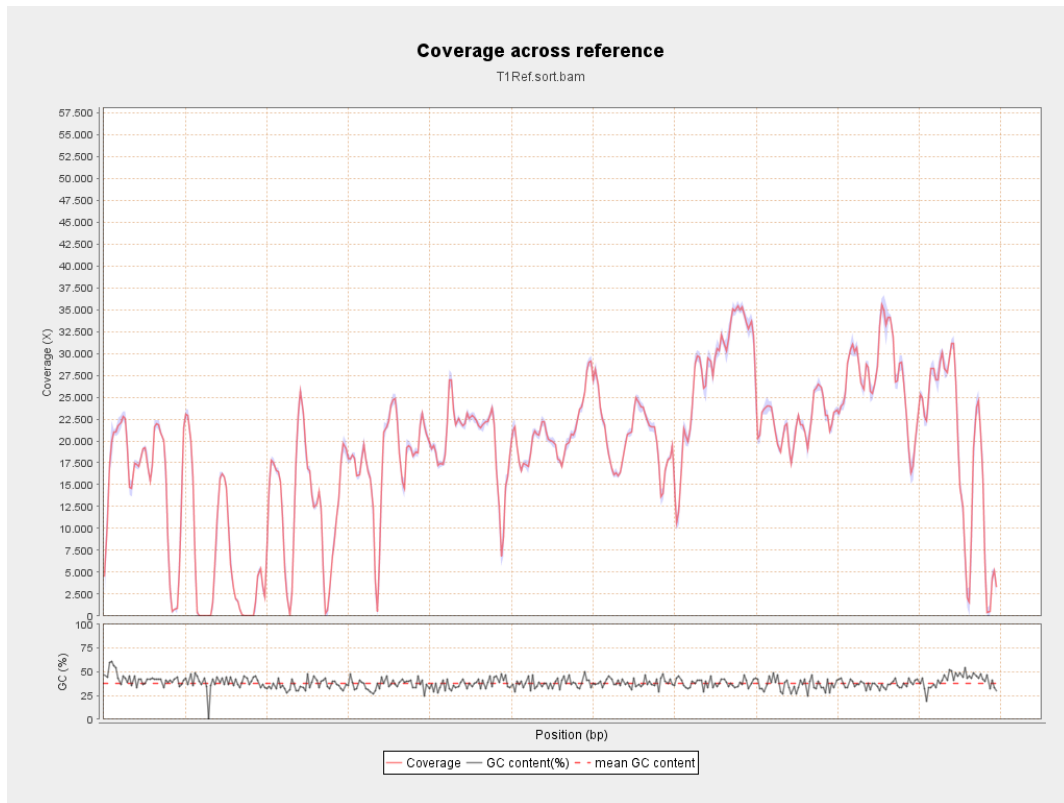



# 4. Results : Coverage Histogram

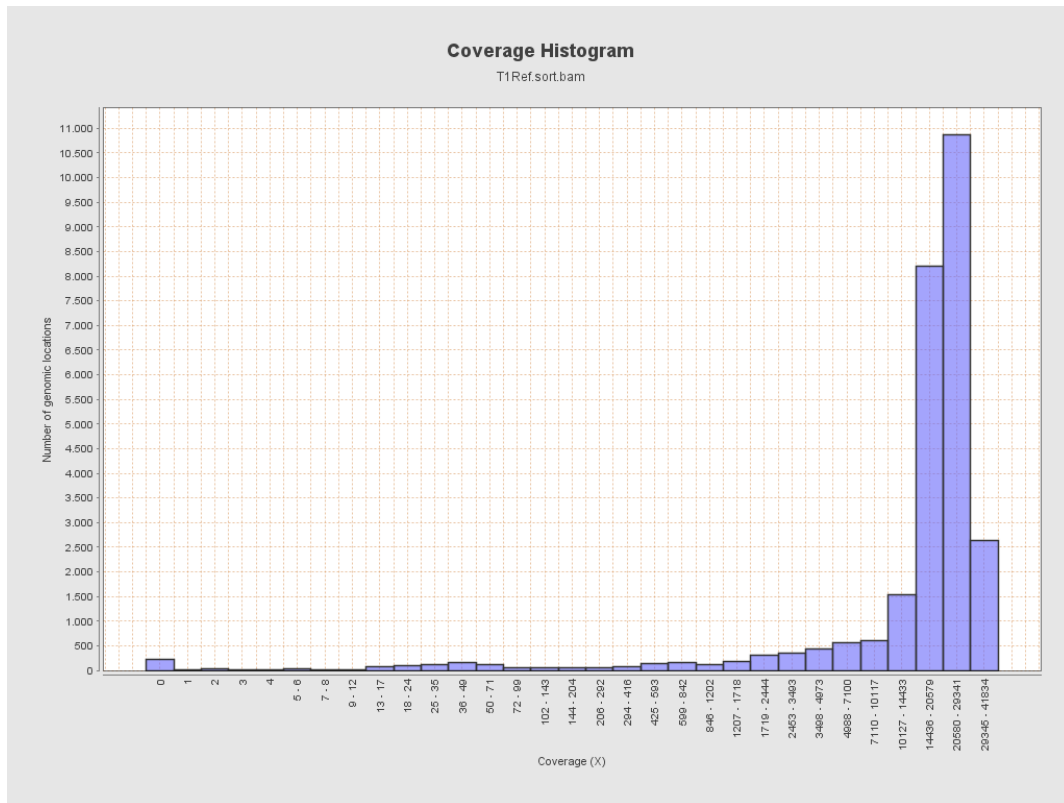

## 5. Results : Coverage Histogram (0-50X)

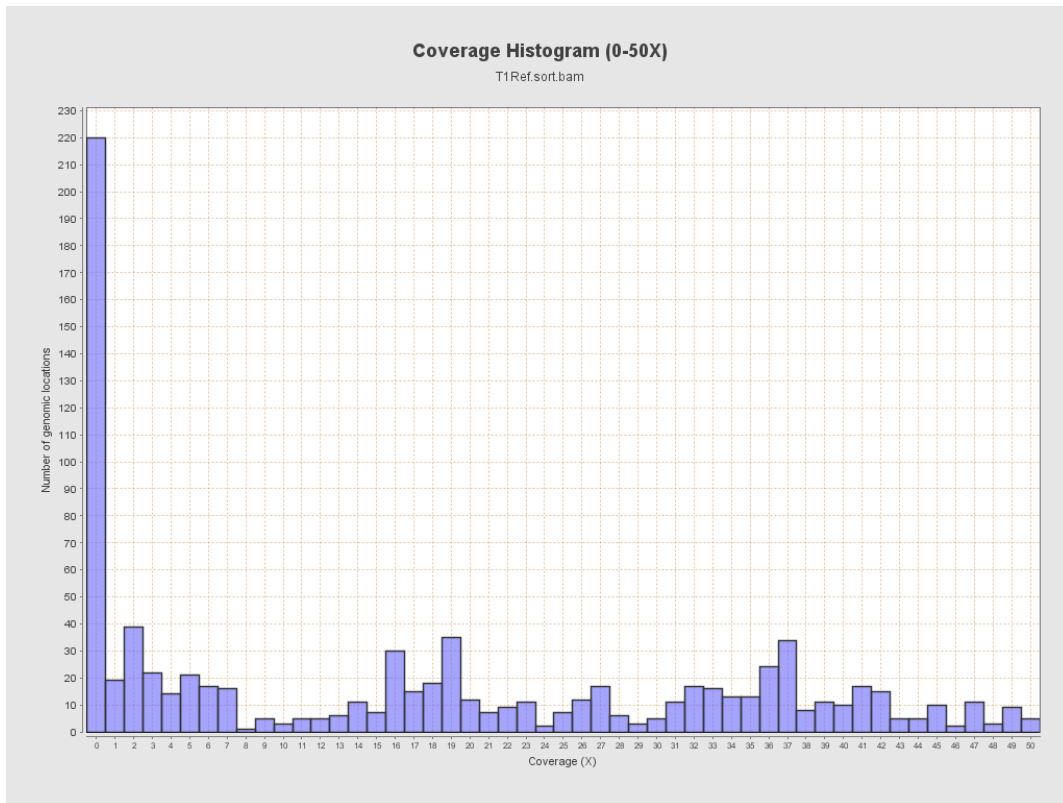

## 6. Results : Genome Fraction Coverage

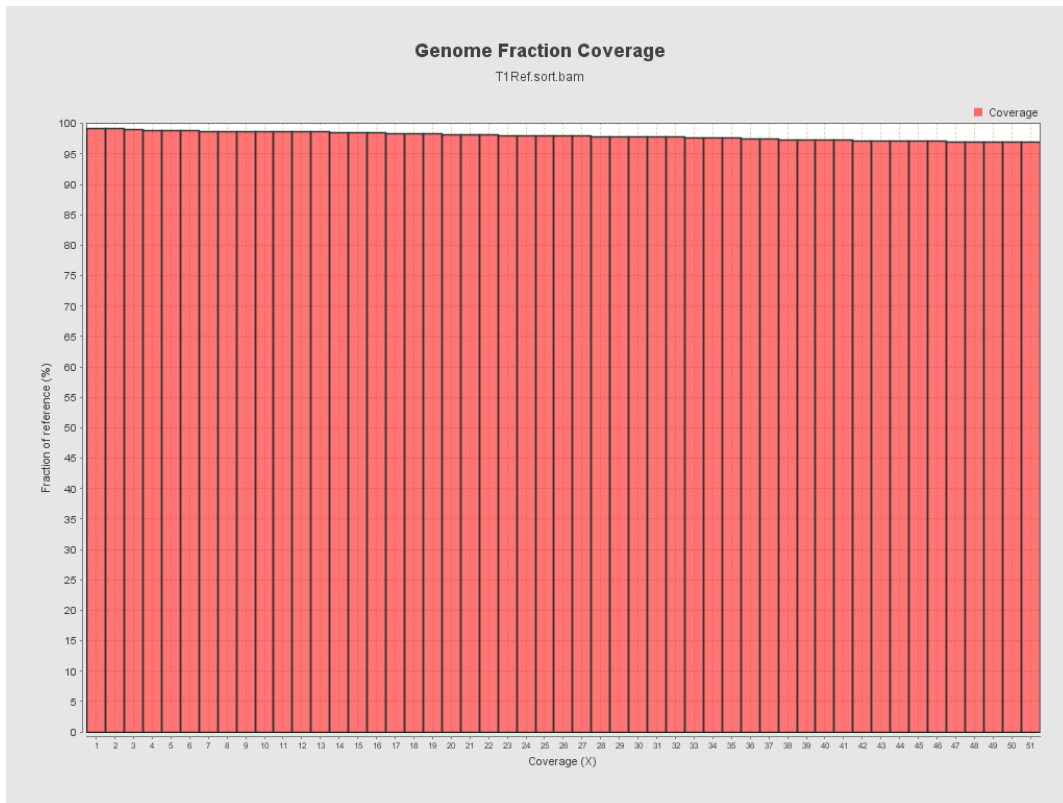

# 7. Results : Duplication Rate Histogram

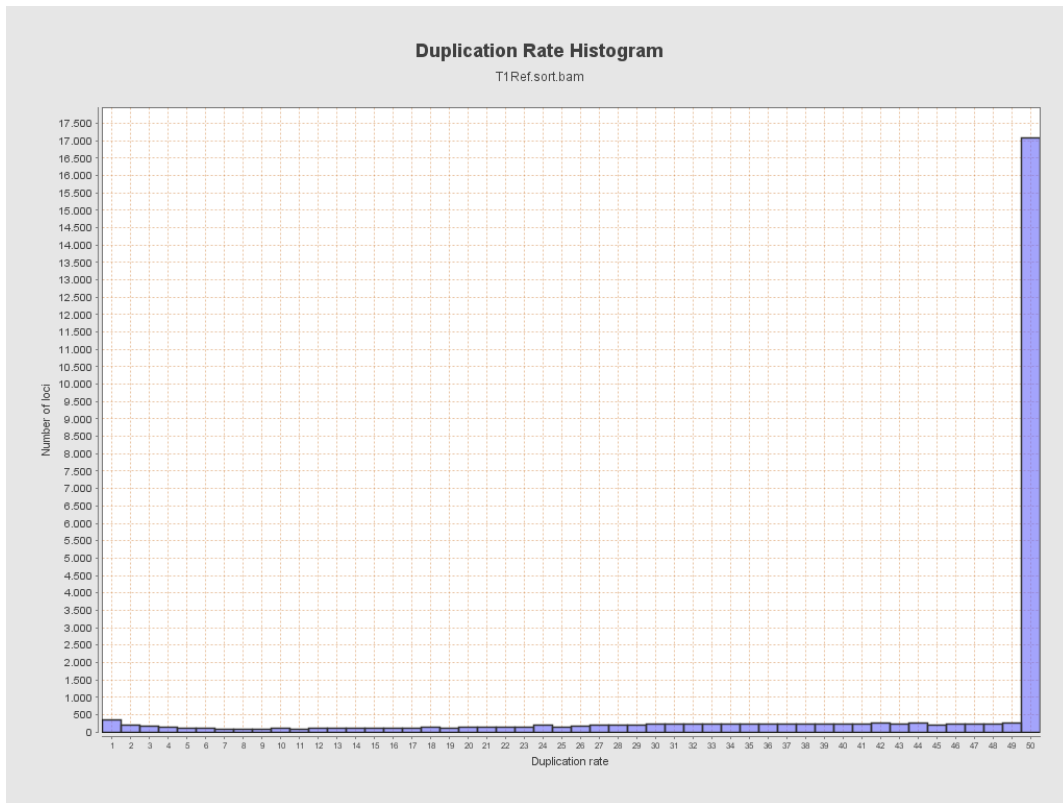

## 8. Results : Mapped Reads Nucleotide Content

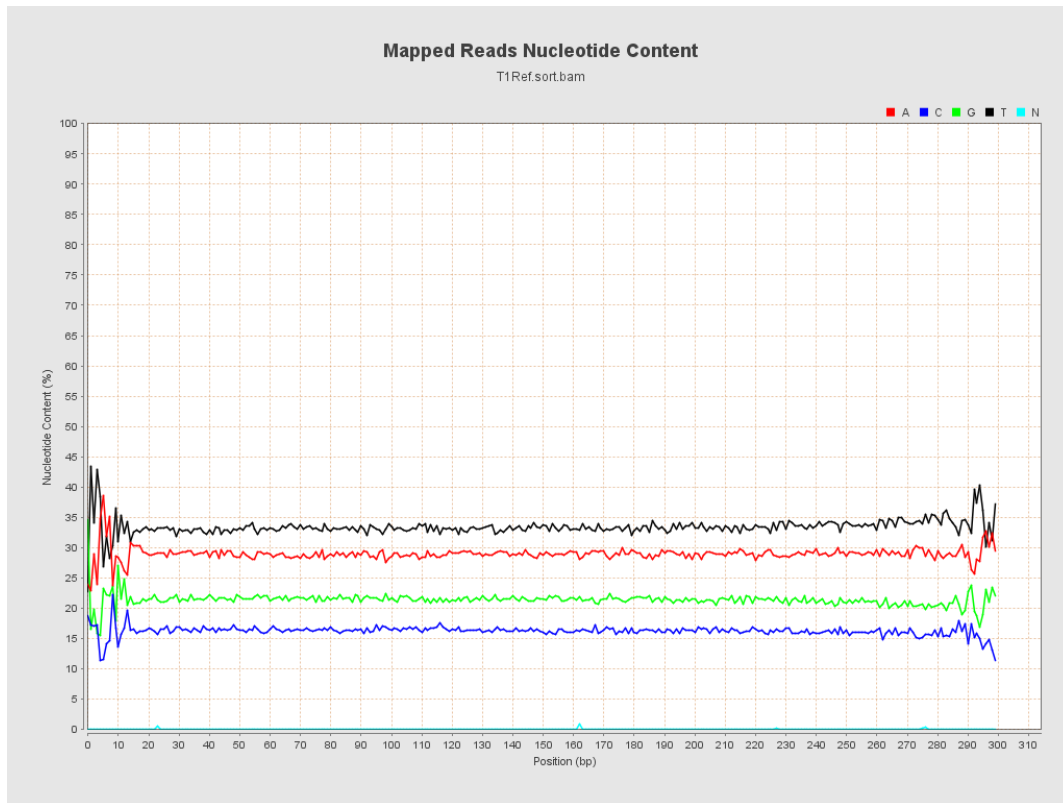

## 9. Results : Mapped Reads GC-content Distribution

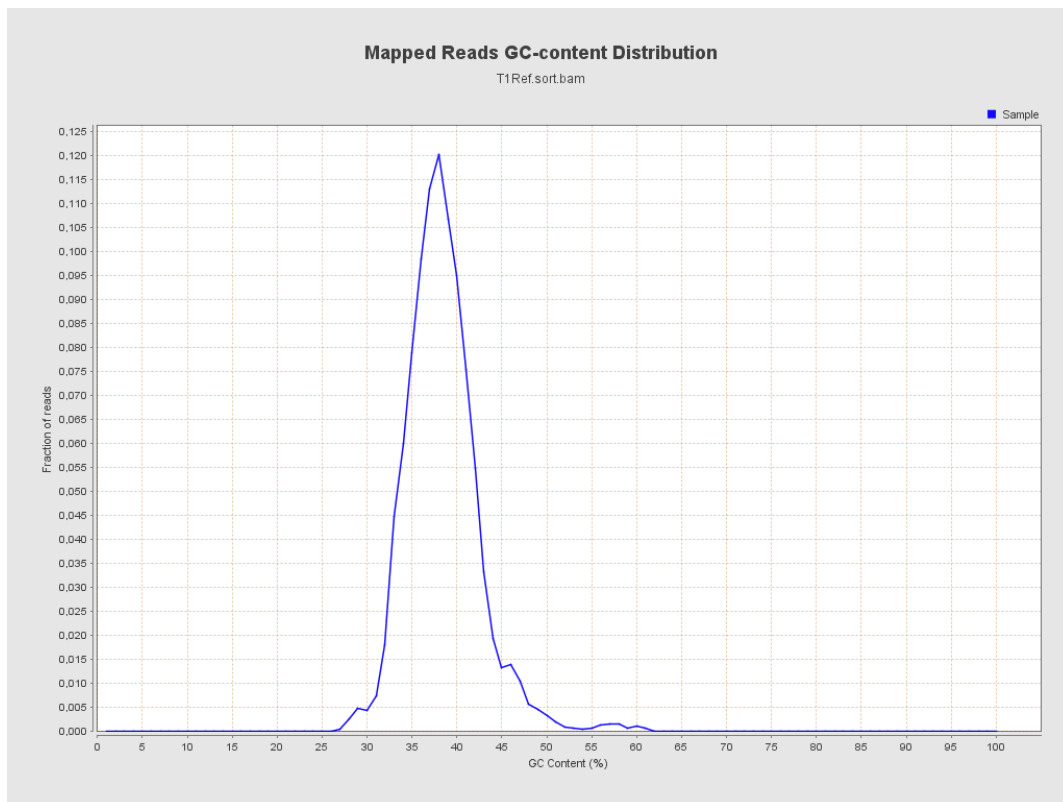

## 10. Results : Homopolymer Indels

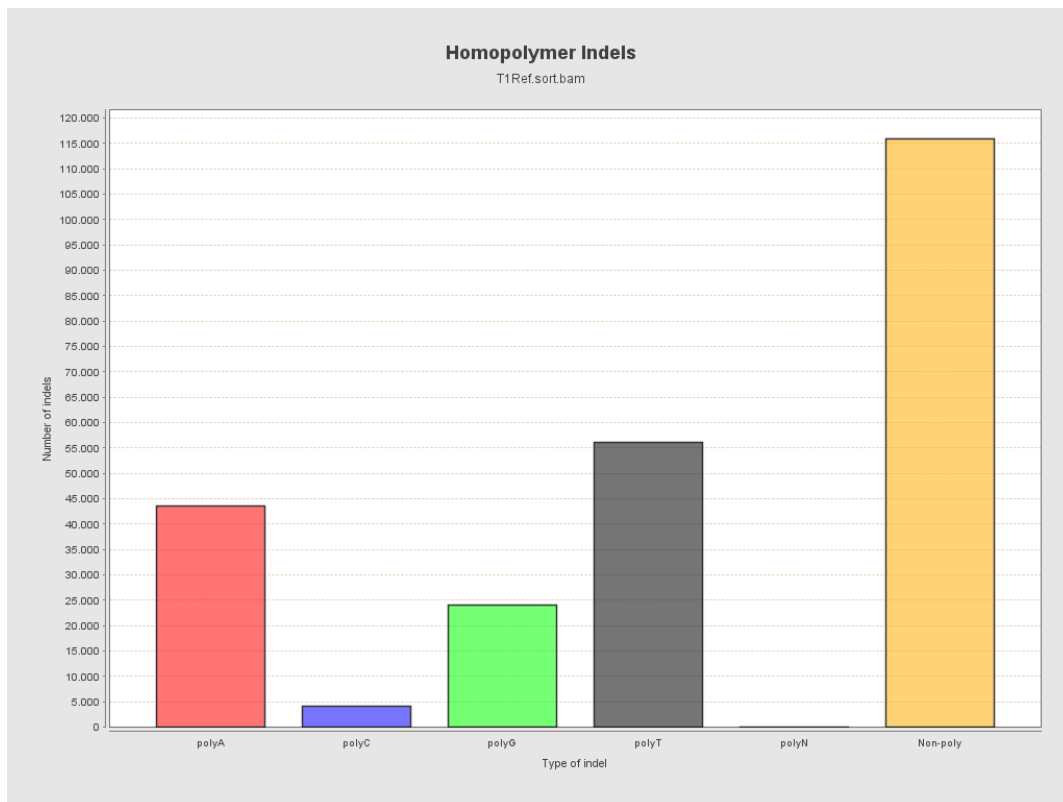

# 11. Results : Mapping Quality Across Reference

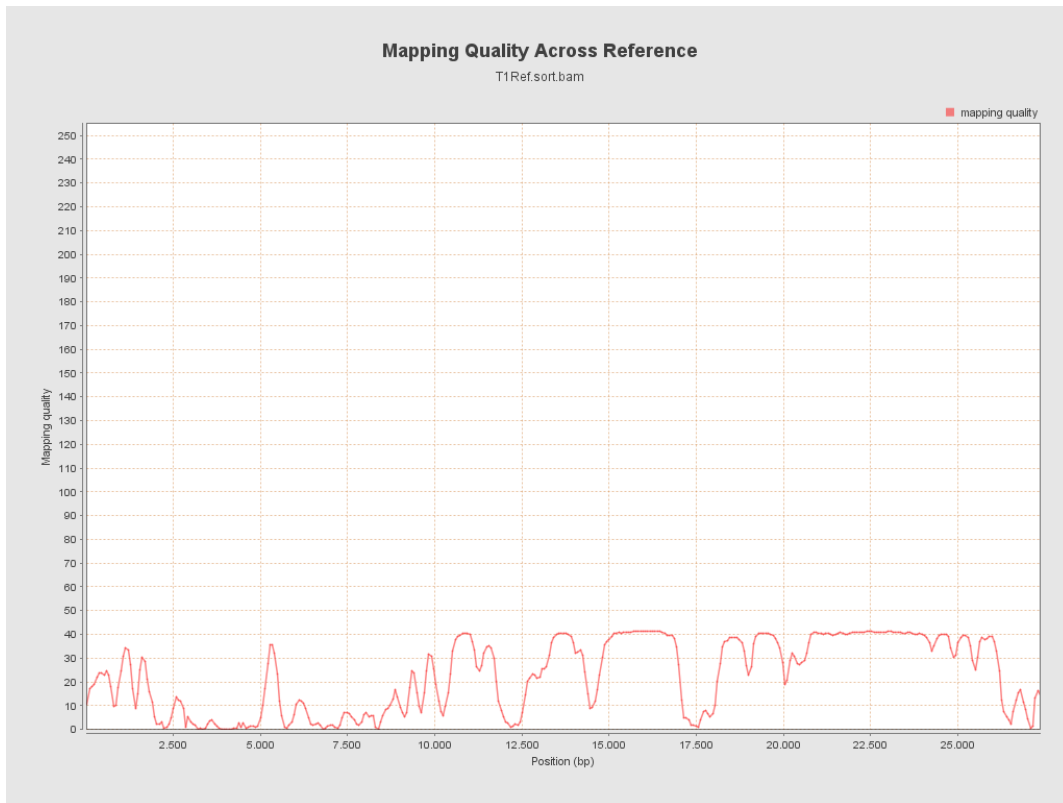



# 12. Results : Mapping Quality Histogram

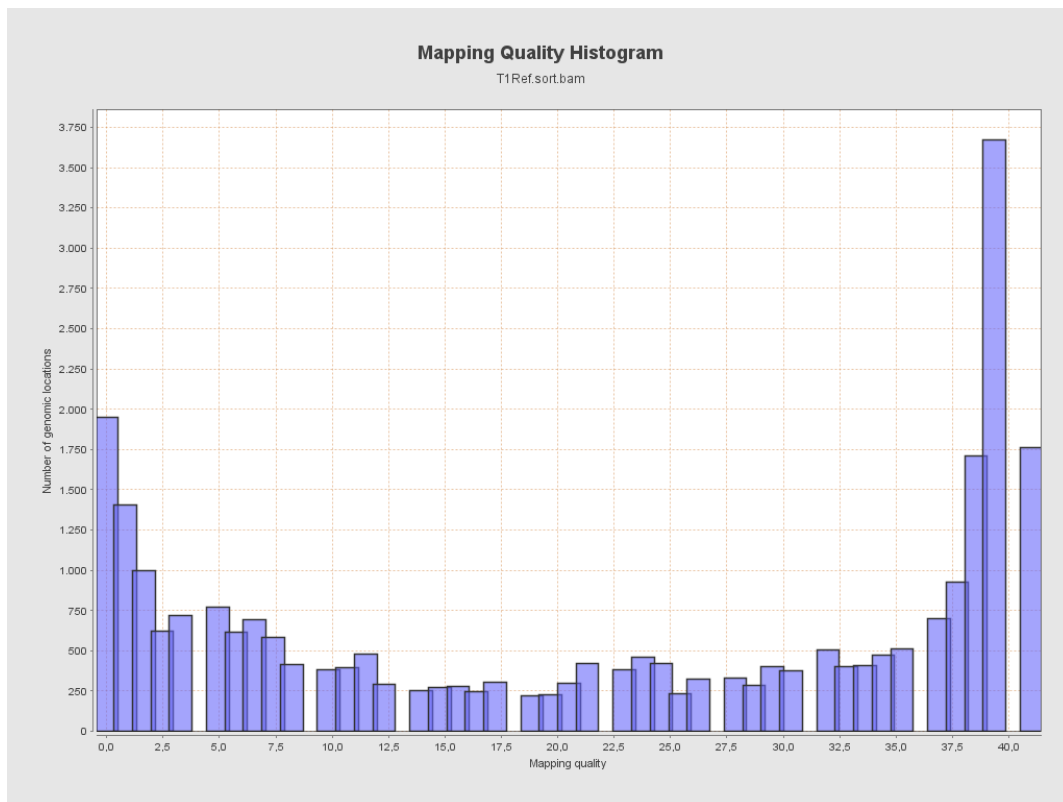

# 13. Results : Insert Size Across Reference

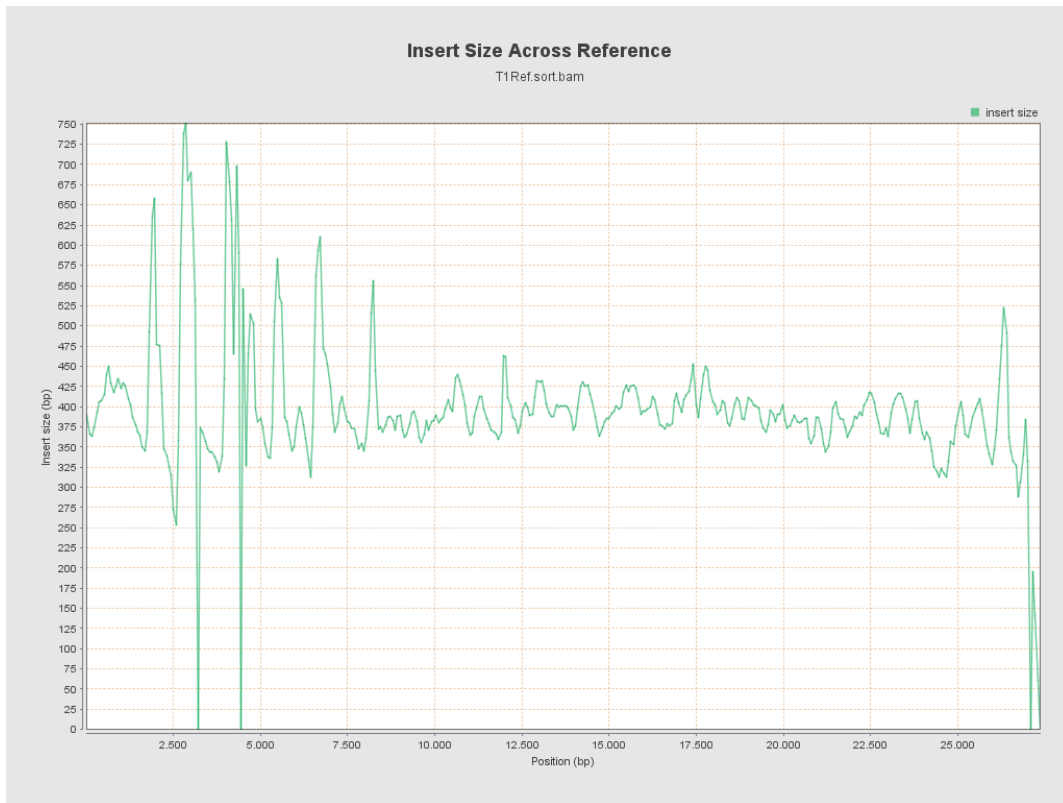

## 14. Results : Insert Size Histogram

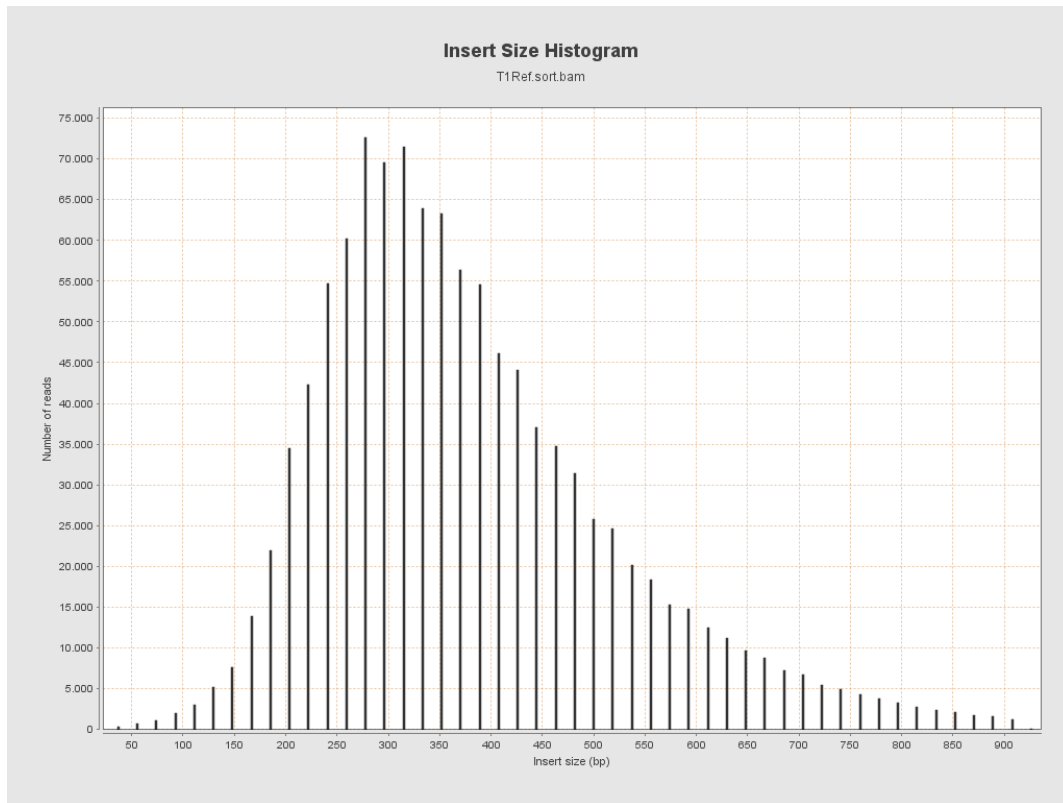

### Reference

Okonechnikov, K., Conesa, A., García-Alcalde, F., 2016 Qualimap 2: advanced multi-sample quality control for high-throughput sequencing data. *Bioinformatics* 32(2), 292–294.
